# Supplementary material
Source: ML conference proceedings conference paper supplement (https://openaccess.thecvf.com/content/CVPR2026/html/Xiao_Bypassing_the_Transport_CVPR_2026_paper.html)
Supplement: Supplementary file 1 [file Xiao_Bypassing_the_Transport_CVPR_2026_supplemental.pdf]

# Bypassing the Transport Plan: Dynamic Reweighting for Out-of-Distribution Detection with Optimal Transport

## Supplementary Material

### 6. Proof of Proposition 3.1

**Proposition 3.1** (Dynamic Reweighting with Exact SemiUOT Solver). *Given SemiUOT with KL-Divergence shown in Equation (2), we can rewrite its dual form as below:*

$$\begin{aligned} \min_{\mathbf{u}, \mathbf{v}, \mathbf{s}, \zeta} \mathcal{J} &= \tau_a \left\langle \mathbf{a}, \exp \left( -\frac{\mathbf{u} + \zeta}{\tau_a} \right) \right\rangle - \langle \mathbf{v} - \zeta, \mathbf{b} \rangle, \\ \text{s.t. } u_i + v_j + s_{ij} &= C_{ij}, s_{ij} \geq 0, \end{aligned} \quad (13)$$

where  $\mathbf{u}$ ,  $\mathbf{v}$ ,  $\mathbf{s}$ , and  $\zeta$  are dual variables. Equation (13) can be rewritten as classical OT:

$$\begin{aligned} \min_{\pi \geq 0} \mathcal{J}_S &= \langle \mathbf{C}, \pi \rangle, \\ \text{s.t. } \pi \mathbf{1}_N &= \mathbf{a} \odot \exp \left( -\frac{\mathbf{u}^* + \zeta^*}{\tau_a} \right), \pi^\top \mathbf{1}_M = \mathbf{b}, \end{aligned} \quad (14)$$

where  $\mathbf{u}^*$  and  $\zeta^*$  are the optimal value of  $\mathbf{u}$  and  $\zeta$ .

**Proof.** We can rewrite the SemiUOT problem as below:

$$\begin{aligned} \min_{\pi \geq 0} J &= \langle \mathbf{C}, \pi \rangle + \tau_a \text{KL}(\pi \mathbf{1}_N \| \mathbf{a}) \\ \text{s.t. (Constraint)} &: \pi^\top \mathbf{1}_M = \mathbf{b}, \text{ (Optional)} : \pi \mathbf{1}_N = \alpha. \end{aligned}$$

Note that we do not need to know the exact value of  $\alpha$  beforehand. We adopt this optional constraint only for simplifying the following deduction. The Lagrange multipliers of Semi-UOT with KL-Divergence is given as:

$$\begin{aligned} \max_{\mathbf{s} \geq 0, \mathbf{u}, \mathbf{v}, \zeta} \min_{\pi \geq 0} \mathcal{J} &= \\ \tau_a \text{KL}(\pi \mathbf{1}_N \| \mathbf{a}) &+ \langle \mathbf{u} + \zeta, \pi \mathbf{1}_N \rangle + \langle \mathbf{v} - \zeta, \mathbf{b} \rangle + \mathcal{E}_{\text{SUOT}} \end{aligned}$$

where  $\mathcal{E}_{\text{SUOT}} = \sum_{i,j} (C_{ij} - u_i - v_j - s_{ij}) \pi_{ij} = \langle \mathbf{C} - \mathbf{u} \otimes \mathbf{1}_N^\top - \mathbf{1}_M \otimes \mathbf{v}^\top - \mathbf{s}, \pi \rangle$  and  $\mathbf{u}$ ,  $\mathbf{v}$  and  $\zeta$  are dual variables. By taking the differentiation on  $\pi_{ij}$  we have:

$$\begin{aligned} \frac{\partial \mathcal{J}}{\partial \pi_{ij}} &= \\ &= \left[ \tau_a \log \frac{\sum_{j=1}^N \pi_{ij}}{a_i} + u_i + \zeta \right] + (C_{ij} - u_i - v_j - s_{ij}) \\ &= C_{ij} + \tau_a \log \frac{\sum_{j=1}^N \pi_{ij}}{a_i} + \zeta - v_j - s_{ij} = 0. \end{aligned}$$

Then we can obtain the results:

$$\begin{aligned} \left\{ \begin{aligned} \sum_{j=1}^N \pi_{ij} &= a_i \exp \left( -\frac{u_i + \zeta}{\tau_a} \right) \\ \sum_{i=1}^M \pi_{ij} &= b_j \end{aligned} \right. \\ \Rightarrow C_{ij} - u_i - v_j - s_{ij} &= 0, \quad s_{ij} \geq 0. \end{aligned}$$

Thus SemiUOT can be regarded as classic optimal transport problem:

$$\begin{aligned} \min_{\pi \geq 0} \mathcal{J}_S &= \langle \mathbf{C}, \pi \rangle \\ \text{s.t. } \pi \mathbf{1}_N &= \mathbf{a} \odot \exp \left( -\frac{\mathbf{u}^* + \zeta^*}{\tau_a} \right), \pi^\top \mathbf{1}_M = \mathbf{b}. \end{aligned}$$

### 7. Proof of Proposition 3.2

**Proposition 3.2** (Accelerating dynamic reweighting with approximation). *We consider a smooth approximation of SemiUOT to replace  $\inf(\cdot)$  as  $\inf_{k \in [M]} [C_{kj} - u_k] \approx -\epsilon \log[\sum_{k=1}^M e^{\frac{u_k - C_{kj}}{\epsilon}}]$ . Note that  $\epsilon > 0$  denotes the balanced hyperparameter among precision and smoothness of the function. Smaller  $\epsilon$  (e.g.,  $\epsilon$  approaches to 0) could lead to more accurate while less smooth solutions. Then we can obtain the proposed Approximate SemiUOT Equation as  $\widehat{\mathcal{J}}_S$  by replacing  $\inf(\cdot)$  with the smoothness term for  $\widehat{\mathbf{u}}$ ,*

$$\begin{aligned} \min_{\mathbf{u}, \zeta} \widehat{\mathcal{J}}_S &= \tau_a \exp \left( -\frac{\zeta}{\tau_a} \right) \sum_{i=1}^M a_i \exp \left( -\frac{u_i}{\tau_a} \right) + \\ &\sum_{j=1}^N \left[ \epsilon \log \left[ \sum_{k=1}^M \exp \left( \frac{u_k - C_{kj}}{\epsilon} \right) \right] + \zeta \right] b_j. \end{aligned} \quad (15)$$

Then,  $u_i$  can be iteratively updated as follows:

$$\begin{aligned} u_i^{(l+1)} &= \mathcal{T}(u_i^{(l)}) = \frac{\tau_a \epsilon}{\tau_a + \epsilon} \log \left( a_i \exp \left( -\frac{\zeta}{\tau_a} \right) \right) - \\ &\frac{\tau_a \epsilon}{\tau_a + \epsilon} \log \left[ \sum_{j=1}^N \left[ \frac{\exp \left( -\frac{C_{ij}}{\epsilon} \right)}{\sum_{k=1}^M \exp \left( \frac{u_k^{(l)} - C_{kj}}{\epsilon} \right)} \right] b_j \right]. \end{aligned} \quad (16)$$

Meanwhile,  $\zeta$  can eventually be computed as:

$$\zeta = \tau_a \left[ \log \left( \sum_{i=1}^M a_i \exp \left( -\frac{u_i}{\tau_a} \right) \right) - \log \left( \sum_{j=1}^N b_j \right) \right]. \quad (17)$$

**Proof.** Although  $\mathcal{J}_S$  is convex and has unique solutions, the presence of  $\inf(\cdot)$  renders it a non-smooth function, leading to inefficient optimization. To further accelerate the optimization process, we consider to make a smooth approximation on replacing  $\inf(\cdot)$  as  $\inf_{k \in [M]} [C_{kj} - u_k] \approx -\epsilon \log[\sum_{k=1}^M e^{\frac{u_k - C_{kj}}{\epsilon}}]$ . Note that  $\epsilon > 0$  denotes the balanced hyper parameters among the accuracy and function

smoothness. Smaller  $\epsilon$  (e.g.,  $\epsilon$  approaches to 0) could lead to more accurate while less smooth solutions. Then we can obtain the proposed *Approximate SemiUOT Equation* as  $\widehat{\mathcal{J}}_S$  by replacing  $\inf(\cdot)$  with the smoothness term for  $\widehat{f}$  as below:

$$\begin{aligned} \min_{\mathbf{u}, \zeta} \widehat{\mathcal{J}}_S &= \tau_a \exp\left(-\frac{\zeta}{\tau_a}\right) \sum_{i=1}^M a_i \exp\left(-\frac{u_i}{\tau_a}\right) \\ &+ \sum_{j=1}^N \left[ \epsilon \log \left[ \sum_{k=1}^M \exp\left(\frac{u_k - C_{kj}}{\epsilon}\right) \right] + \zeta \right] b_j. \end{aligned}$$

Take the differentiation on  $u_i$  we can obtain:

$$\begin{aligned} \frac{\partial \widehat{\mathcal{J}}_S}{\partial u_i} &= -a_i \exp\left(-\frac{\zeta}{\tau_a}\right) \exp\left(-\frac{u_i}{\tau_a}\right) \\ &+ \exp\left(\frac{u_i}{\epsilon}\right) \sum_{j=1}^N \left[ \frac{\exp\left(-\frac{C_{ij}}{\epsilon}\right)}{\sum_{k=1}^M \exp\left(\frac{u_k - C_{kj}}{\epsilon}\right)} \right] b_j \\ &= 0. \end{aligned}$$

To solve the above problem, we can obtain:

$$\begin{aligned} u_i^{(l+1)} &= \frac{\tau_a \epsilon}{\tau_a + \epsilon} \log\left(a_i \exp\left(-\frac{\zeta}{\tau_a}\right)\right) \\ &- \frac{\tau_a \epsilon}{\tau_a + \epsilon} \log\left[ \sum_{j=1}^N \left[ \frac{\exp\left(-\frac{C_{ij}}{\epsilon}\right)}{\sum_{k=1}^M \exp\left(\frac{u_k^{(l)} - C_{kj}}{\epsilon}\right)} \right] b_j \right] \\ &= \mathcal{T}(u_i^{(l)}). \end{aligned}$$

We can adopt Banach theorem to verify the convergence of the algorithm.

$$\begin{aligned} \frac{\partial \mathcal{T}(u_i^{(l)})}{\partial u_i^{(l)}} &= \frac{\tau_a \epsilon}{\tau_a + \epsilon} \frac{\frac{\partial}{\partial u_i^{(l)}} \left( \sum_{j=1}^N \left[ \frac{\exp\left(-\frac{C_{ij}}{\epsilon}\right)}{\sum_{k=1}^M \exp\left(\frac{u_k^{(l)} - C_{kj}}{\epsilon}\right)} \right] b_j \right)}{\sum_{j=1}^N \left[ \frac{\exp\left(-\frac{C_{ij}}{\epsilon}\right)}{\sum_{k=1}^M \exp\left(\frac{u_k^{(l)} - C_{kj}}{\epsilon}\right)} \right] b_j} \\ &= \frac{\tau_a}{\tau_a + \epsilon} \frac{\sum_{j=1}^N \left[ \frac{b_j \exp\left(-\frac{C_{ij}}{\epsilon}\right) \exp\left(\frac{u_i^{(l)} - C_{ij}}{\epsilon}\right)}{\sum_{k=1}^M \exp\left(\frac{u_k^{(l)} - C_{kj}}{\epsilon}\right) \sum_{k=1}^M \exp\left(\frac{u_k^{(l)} - C_{kj}}{\epsilon}\right)} \right]}{\underbrace{\sum_{j=1}^N \left[ \frac{\exp\left(-\frac{C_{ij}}{\epsilon}\right)}{\sum_{k=1}^M \exp\left(\frac{u_k^{(l)} - C_{kj}}{\epsilon}\right)} \right] b_j}_{\leq 1}} \\ &\leq 1. \end{aligned}$$

## 8. Proof of Proposition 3.3

**Proposition 3.3** (*Approximation error*). *We consider the analysis between optimal results of  $\mathbf{u}$  and  $\widehat{\mathbf{u}}$  via setting  $\zeta = 0$  in SemiUOT. Then we define  $E_P(\mathbf{u}) = \mathcal{J}_S$  and  $K_P(\widehat{\mathbf{u}}) = \widehat{\mathcal{J}}_S$ . Hence we have the following relationships: (1)  $|K_P(\mathbf{u}) - E_P(\mathbf{u})| \leq \epsilon \log M$ , (2)  $|E_P(\widehat{\mathbf{u}}) - K_P(\widehat{\mathbf{u}})| \leq 0$ . Thus we have the following error bound:*

$$|K_P(\mathbf{u}) - K_P(\widehat{\mathbf{u}})| \leq \epsilon \log M. \quad (18)$$

Therefore  $\mathbf{u}$  and  $\widehat{\mathbf{u}}$  will get closer with smaller  $\epsilon$ .

**Proof.** By definition of the optimal transport problem, the regularized optimal potential  $\widehat{\mathbf{u}}$  and the unregularized optimal potential  $\mathbf{u}$  satisfy:

$$K_P(\widehat{\mathbf{u}}) \leq K_P(\mathbf{u}), \quad E_P(\mathbf{u}) \leq E_P(\widehat{\mathbf{u}}). \quad (19)$$

Next, we bound the regularization gap at the unregularized optimum  $\mathbf{u}$ . Specifically,

$$\begin{aligned} \text{error} &= K_P(\mathbf{u}) - E_P(\mathbf{u}) \\ &= \sum_{j=1}^N \epsilon b_j \log \left[ \sum_{k=1}^M \exp\left(\frac{u_k - C_{kj}}{\epsilon}\right) \right] - \sum_{j=1}^N \sup_{k \in [M]} [u_k - C_{kj}] b_j \\ &\leq \sum_{j=1}^N \epsilon b_j \left[ \log \left( M \exp \left( \sup_{k \in [M]} \left( \frac{u_k - C_{kj}}{\epsilon} \right) \right) \right) \right. \\ &\quad \left. - \log \left( \exp \left( \sup_{k \in [M]} \left( \frac{u_k - C_{kj}}{\epsilon} \right) \right) \right) \right] \\ &= \epsilon \log M. \end{aligned} \quad (20)$$

Moreover, for any  $\mathbf{u}$ , and in particular for  $\widehat{\mathbf{u}}$ , we have

$$\begin{aligned} \sum_{j=1}^N b_j \sup_{k \in [M]} [\widehat{u}_k - C_{kj}] - \sum_{j=1}^N \epsilon b_j \log \sum_{k=1}^M \exp\left(\frac{\widehat{u}_k - C_{kj}}{\epsilon}\right) \\ \leq 0. \end{aligned} \quad (21)$$

That is,

$$E_P(\widehat{\mathbf{u}}) \leq K_P(\widehat{\mathbf{u}}). \quad (22)$$

Combining this with Equation (19), we obtain

$$E_P(\mathbf{u}) \leq E_P(\widehat{\mathbf{u}}) \leq K_P(\widehat{\mathbf{u}}) \leq K_P(\mathbf{u}) \leq E_P(\mathbf{u}) + \epsilon \log M. \quad (23)$$

Therefore,

$$0 \leq K_P(\widehat{\mathbf{u}}) - E_P(\mathbf{u}) \leq \epsilon \log M, \quad (24)$$

which completes the proof.

## 9. Implementation details

To be fair, we adopt Wide ResNet (WRN) [54] as the backbone, with WRN-28-2 on CIFAR-10 and WRN-28-8 on CIFAR-100, consistent with the baseline. For each batch, the size of  $\mathbf{X}_u$  is twice that of  $\mathbf{X}_l$ . Since Fixmatch is used in the closed-set semi-supervised classification module of DREW in the experimental part, we set the temperature parameter of pseudo-label to 1 and the threshold of pseudo-label to 0.95. The model is trained with a Nesterov SGD optimizer with 0.9 momentum and  $5 \times 10^{-4}$  weight decay. We implement the cosine annealing learning rate adjustment strategy and set the initial learning rate as 0.03.  $\tau_a$  in Equation (2) is set to 0.01 when comparing DREW with baselines. Putting all the components together, we set the balance factor of  $L_x$  and  $L_u$  as 1 while setting that of  $L_{ood}$  as 0.01. For the ImageNet-30 dataset, We use ResNet-18 [16] as the backbone.
